# Supplementary material for: Preparation and controllable prelithiation of core–shell SnOx@C composites for high-performance lithium-ion batteries
Source: Royal Society of Chemistry journal article supplement (doi:10.1039/d1ce01588e), 2022-01-01
Supplement: d1ce01588e1.pdf [file d1ce01588e1.pdf]

# Supporting Information

## Preparation and Controllable Prelithiation of Core-Shell C@SnO<sub>x</sub> Composites for High-Performance Lithium-Ion Battery

Chengshuai Ma,<sup>a,1</sup> Bo Wang,<sup>\*a,1</sup> Tianren Zhang,<sup>b</sup> Fan Jin,<sup>a</sup> Yang Lu,<sup>a</sup> Yujia Chen,<sup>a</sup>  
Zhenhong Ren,<sup>a</sup> Zhen Jia,<sup>a</sup> Chuan Zheng,<sup>a</sup> Jiahui Fang,<sup>a</sup> Jingxuan Li,<sup>a</sup> Dianlong Wang<sup>\*a</sup>

<sup>a</sup> *MIIT Key Laboratory of Critical Materials Technology for New Energy Conversion and Storage, State Key Laboratory of Urban Water Resource and Environment, School of Chemistry and Chemical Engineering, Harbin Institute of Technology, Harbin 150001, China.*

<sup>b</sup> *Tianneng Group, Changxing 313100, China.*

<sup>1</sup> These authors contribute equally to this work.

The Supporting information includes **10 Figures and 3 Tables**

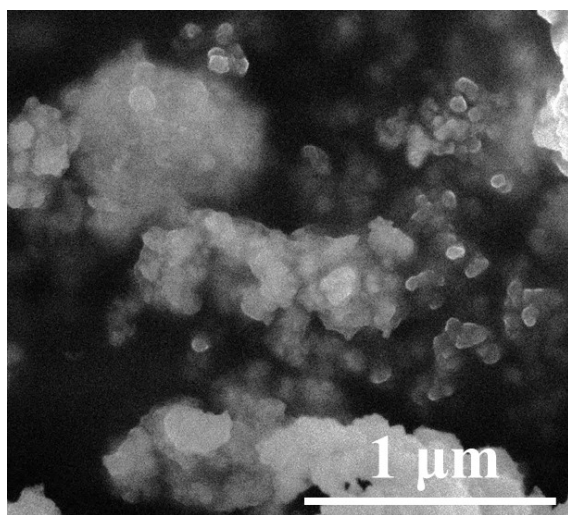

**Figure S1.** SEM images of SnO<sub>x</sub>@C nanoparticles with heat treatment temperature of 400°C

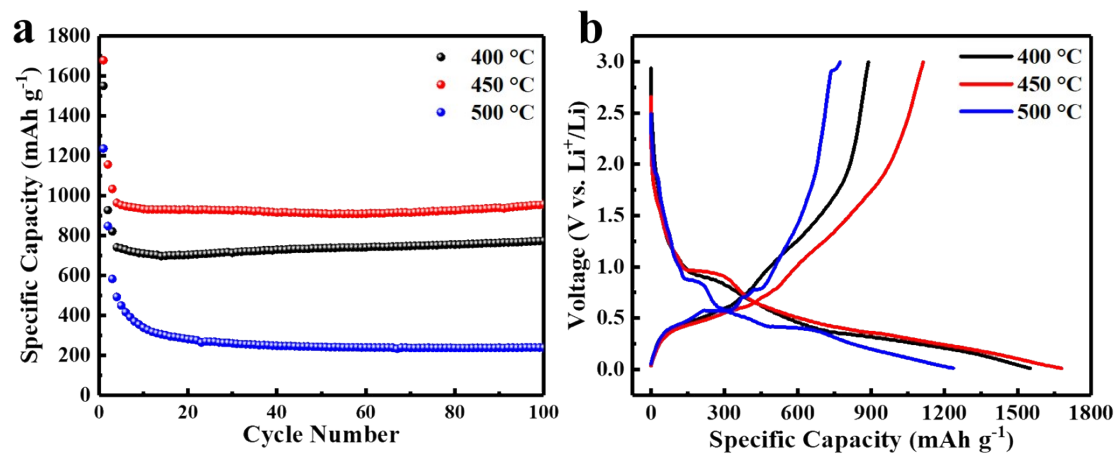

**Figure S2.** (a) Cycling performance of SnO<sub>x</sub>@C with different synthesis temperature at 0.5 A g<sup>-1</sup>; (b) First charge and discharge curves of SnO<sub>x</sub>@C with different synthesis temperature at 0.5 A g<sup>-1</sup>

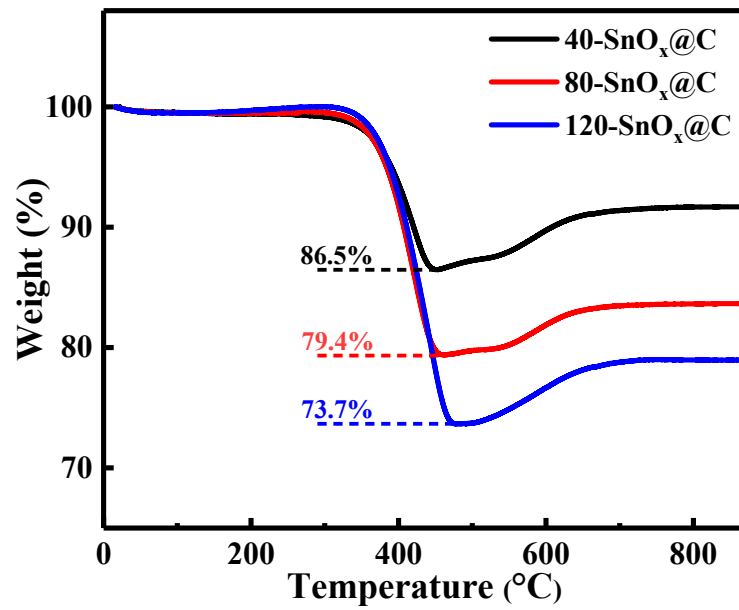

Figure S3. TG curves in air of SnO<sub>x</sub>@C with different coating thickness

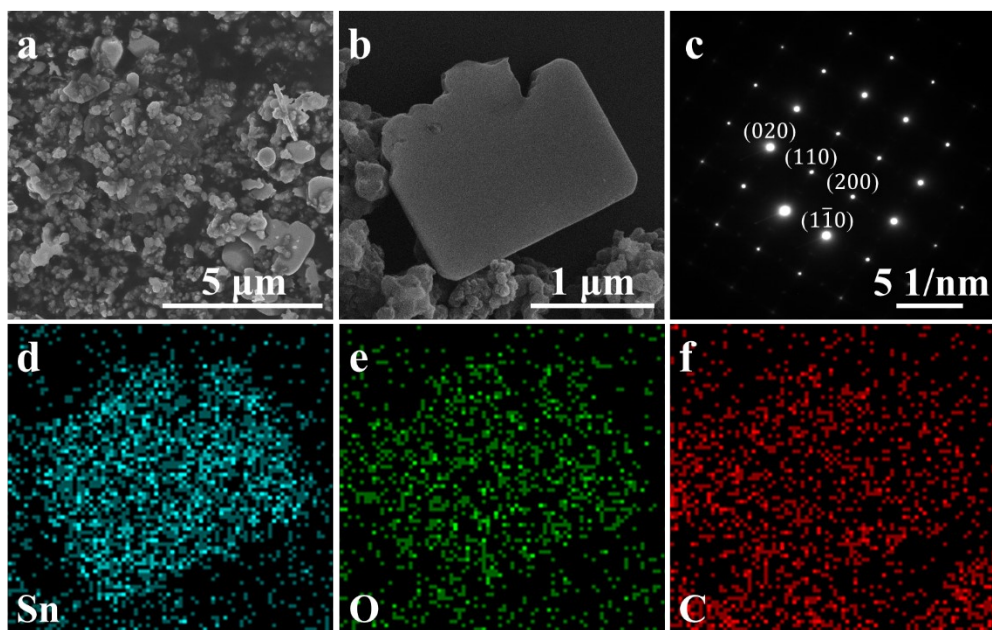

**Figure S4.** (a, b) SEM images of  $\text{SnO}_x@\text{C}$ ; (c) SAED patterns of nanosheets of  $\text{SnO}_x@\text{C}$ ; (d-f) Element mapping images of the nanosheets corresponding to SEM image shown in (b)

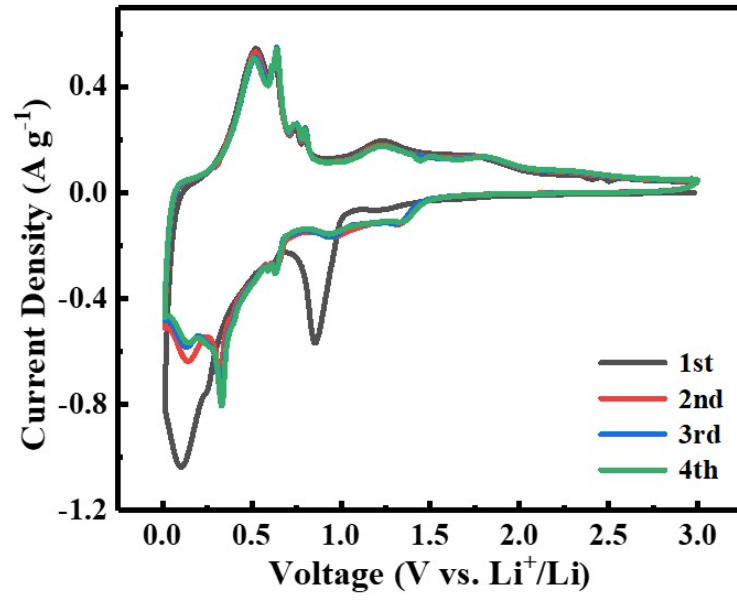

**Figure S5.** CV profiles of 80-SnO<sub>x</sub>@C anode at 0.1 mV s<sup>-1</sup>

a

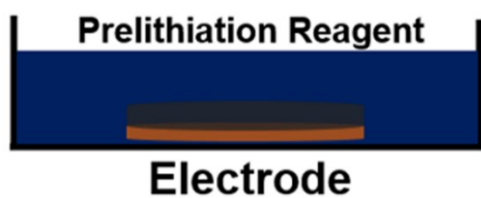

b

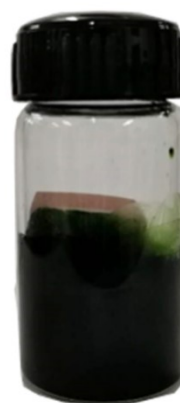

**Figure S6.** (a) Experimental device diagram of chemical prelithiation; (b) Photo of Lithium-4,4'-Dimethylbiphenyl reagent (1 M Li-4,4'-DMBP)

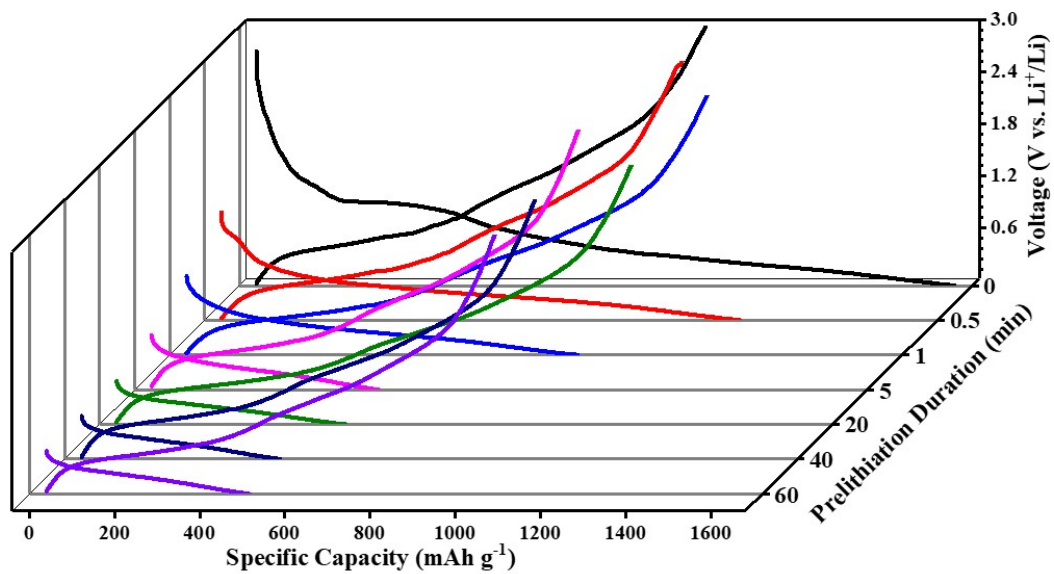

**Figure S7.** The first discharge/charge curves of the Li-SnO<sub>x</sub>@C||Li half cells with different immersion time at 0.1 C rate



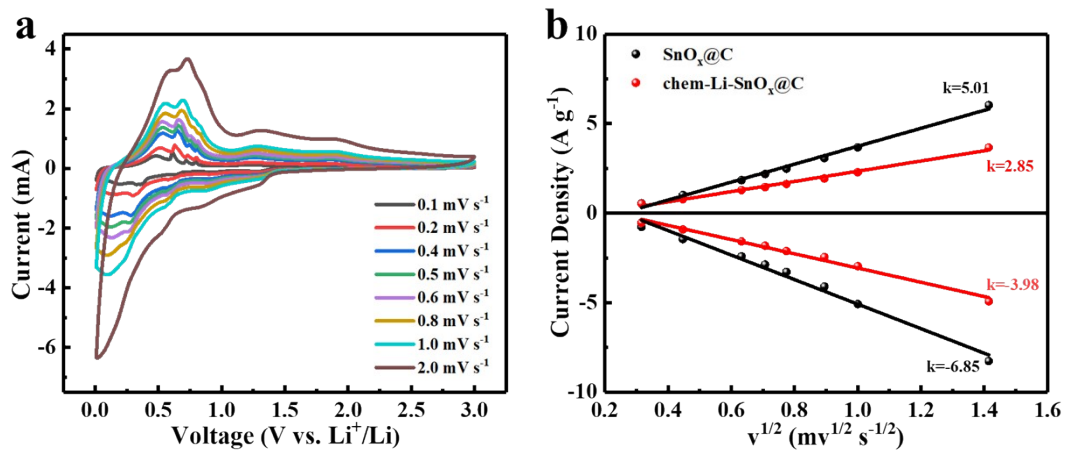

**Figure S8.** (a) Cyclic voltammetry curves of Li-SnO<sub>x</sub>@C at different scanning rates; (b) Fitting lines between peak current and square root of scanning rates of SnO<sub>x</sub>@C and Li-SnO<sub>x</sub>@C

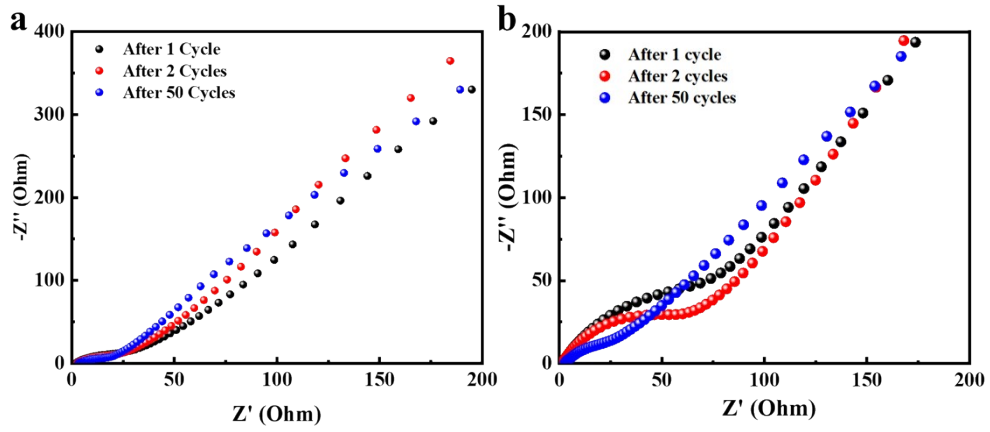

**Figure S9.** EIS at different cycles (a) 80-SnO<sub>x</sub>@C; (b) Li-SnO<sub>x</sub>@C

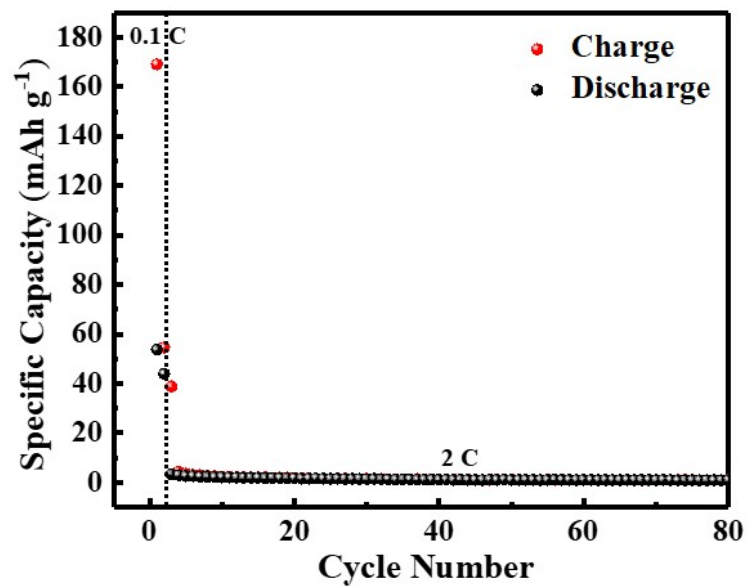

**Figure S10.** Cycling performance of the LFP||SnO<sub>x</sub>@C full-cell without prelithiation at 2 C

**Table S1** The relationship between carbon layer thickness and the addition amount of resorcinol and formaldehyde

| Anode with different carbon layer thickness | Thickness (nm) | Resorcinol (mg) | Formaldehyde ( $\mu\text{L}$ ) |
|---------------------------------------------|----------------|-----------------|--------------------------------|
| 40-SnO <sub>x</sub> @C                      | 10             | 40              | 56                             |
| 80-SnO <sub>x</sub> @C                      | 13             | 80              | 112                            |
| 120-SnO <sub>x</sub> @C                     | 25             | 120             | 168                            |

**Table S2** Comparison between this work with other references (SnO<sub>x</sub>@C with different structure)

|   | Morphology                                                                            | Cutoff Voltage (V) | Electrolyte                                                  | ICE (%)                          | Reversible Capacity (mAh g <sup>-1</sup> at 1A g <sup>-1</sup> ) | Cycle Performance                                                      | References |
|---|---------------------------------------------------------------------------------------|--------------------|--------------------------------------------------------------|----------------------------------|------------------------------------------------------------------|------------------------------------------------------------------------|------------|
| 1 | Core-shell nanospheres                                                                | 0.01-3.0           | 1 M LiPF <sub>6</sub> in EC:DEC (1:1 v/v) with 5.0 vol % FEC | <b>64.3 (1 A g<sup>-1</sup>)</b> | <b>854.2</b>                                                     | <b>804.1 mAh g<sup>-1</sup> at 1 A g<sup>-1</sup> after 300 cycles</b> | This work  |
| 2 | Rod-like hierarchical nanostructures                                                  | 0.01-3.0           | 1 M LiPF <sub>6</sub> in EC:DMC:DEC (1:1:1 v/v/v)            | 71.1 (0.2 A g <sup>-1</sup> )    | 823                                                              | 1001mAh g <sup>-1</sup> at 0.2 A g <sup>-1</sup> after 240 cycles      | [1]        |
| 3 | Walnut core-like hollow carbon micro/nanospheres                                      | 0.01-3.0           | 1 M LiPF <sub>6</sub> in EC:DMC (1:1 v/v)                    | 49 (0.2 A g <sup>-1</sup> )      | 359                                                              | 853mAh g <sup>-1</sup> at 0.2 A g <sup>-1</sup> after 400 cycles       | [2]        |
| 4 | Carbon matrix encapsulating heterostructured SnO <sub>x</sub> ultrafine nanoparticles | 0.01-3.0           | 1 M LiPF <sub>6</sub> in EC:DMC (1:1 v/v)                    | 61.4 (0.1 A g <sup>-1</sup> )    | 745.6                                                            | 447.8 mAh g <sup>-1</sup> at 5 A g <sup>-1</sup> after 1200 cycles     | [3]        |
| 5 | Sn and SnO <sub>x</sub> dispersed in carbon nanofibers                                | 0.01-3.0           | 1 M LiPF <sub>6</sub> in EC:DEC (1:1 v/v)                    | 77 (0.5 A g <sup>-1</sup> )      | 442                                                              | 300 mAh g <sup>-1</sup> at 0.5 A g <sup>-1</sup> after 500 cycles      | [4]        |

**Table S3** The open circuit voltage, initial coulombic efficiency and prelithiation degree of half cells in different immersion time

| Immersion Time<br>(min) | OCV<br>(V)    | ICE<br>(%)    | Prelithiation Degree<br>(%) |
|-------------------------|---------------|---------------|-----------------------------|
| <b>0</b>                | <b>2.71</b>   | <b>64.34</b>  | -                           |
| 0.5                     | 1.2534        | 88.87         | 30.57                       |
| 1                       | 0.9170        | 133.22        | 53.96                       |
| 5                       | 0.6364        | 188.15        | 67.43                       |
| <b>20</b>               | <b>0.5109</b> | <b>224.86</b> | <b>72.68</b>                |
| 40                      | 0.5093        | 228.34        | 73.00                       |
| 60                      | 0.5016        | 221.27        | 72.20                       |

Prelithiation degree can be calculated by the following equation:

$$\text{ICE after prelithiation} = \frac{\text{First charge capacity without prelithiation}}{\text{First discharge capacity without prelithiation} \times (1 - \text{prelithiation degree})}$$

## References

1. J. Yang, S. Chen, J. Tang, H. Tian, T. Bai and X. Zhou, *ApSS*, 2018, **435**, 203-209.
2. Q. Tian, Y. Chen, F. Chen, J. Chen and L. Yang, *J. Colloid Interface Sci.*, 2019, **554**, 424-432.
3. H. Li, B. Zhang, X. Ou, L. Tang, C. Wang, L. Cao, C. Peng and J. Zhang, *Ceram. Int.*, 2019, **45**, 18743-18750.
4. D. Spada, P. Bruni, S. Ferrari, B. Albin, P. Galinetto, V. Berbenni, A. Girella, C. Milanese and M. Bini, *Mater. (Basel)*, 2022, **15**.
